# Supplementary material for: Epidemiological Characteristics and Risk Factors for Prolonged Hospitalisation in Oral and Maxillofacial Space Infections: A 3-Year Retrospective Study of 217 cases
Source: Research Square preprint supplement (doi:10.21203/rs.3.rs-5090870/v1), 2025-03-13
Supplement: Supplementary file 1 [file 2f2e1480b30f868350c4cd22.docx]

**Supplement Material**

**
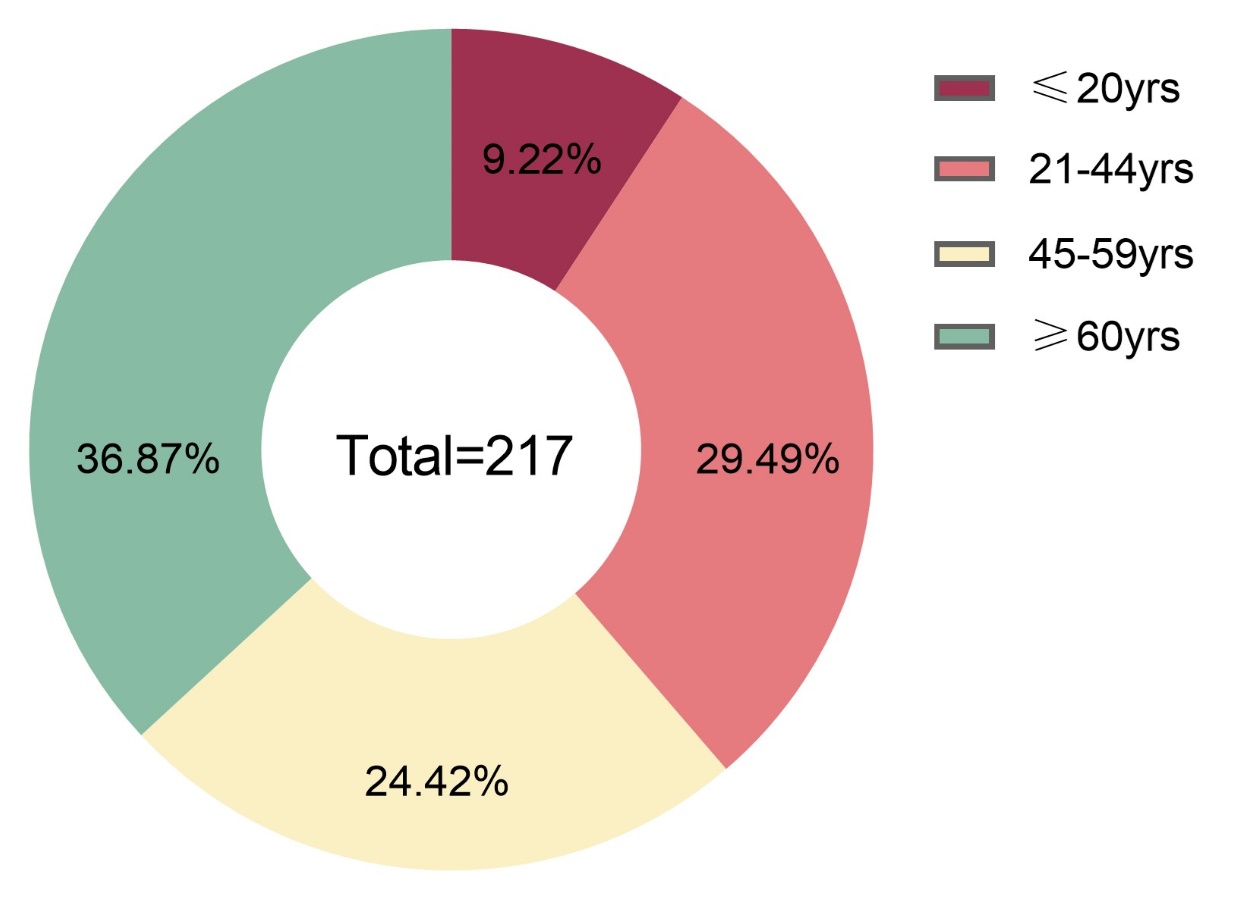
**

Fig. S1 Age distribution of patients with oral and maxillofacial space infection


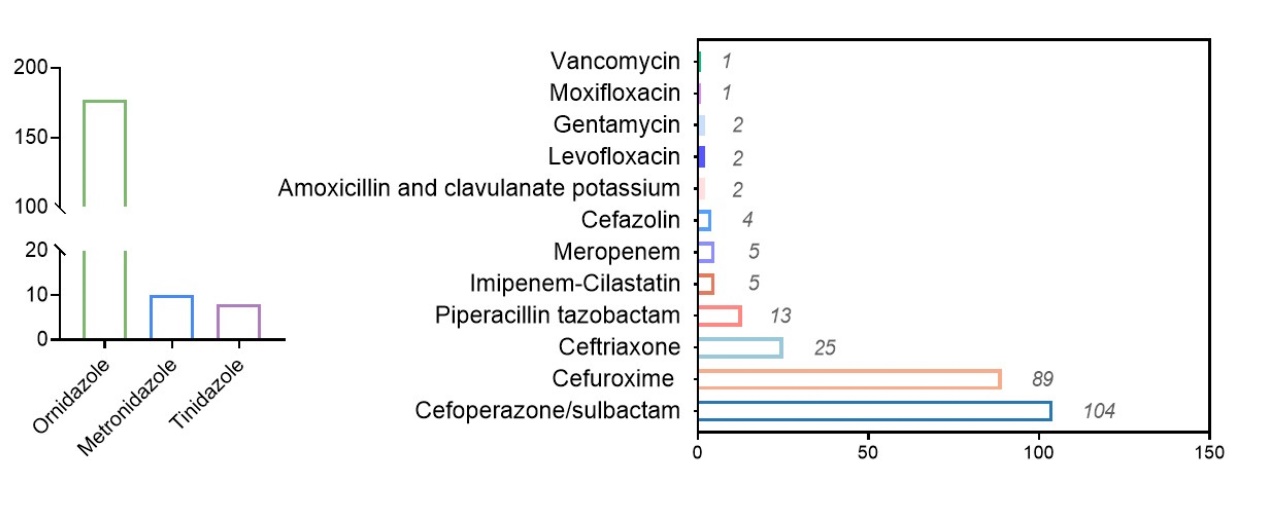


Fig. S2 Use of antibiotics against anaerobic and aerobic bacteria

Table S1. Surgery-related conditions

| **Type of anaesthesia** | ***n*** |
| --- | --- |
| Local anaesthesia | 46 |
| General anaesthesia | 169 |
| **Surgery** **complications** | ***n*** |
| Intubation | 39 |
| Extubation | 130 |

Table S2. Predictive Model Performance Metrics

| **Metric** | **Training Set** | **Validation Set** |
| --- | --- | --- |
| AUC (95% CI) | 0.726 (0.602–0. 850) | 0.712 (0.588–0.838) |
| Precision | 0.644 | 0.622 |
| Recall | 0.935 | 0.903 |
| F1-Score | 0.763 | 0.736 |
